# Supplementary material for: The Gut Microbiota May Affect Personality in Mongolian Gerbils
Source: MDPI journal article supplement (doi:10.3390/microorganisms10051054), 2022-05-20
Supplement: s1 [file s1]

## Supplemental Material

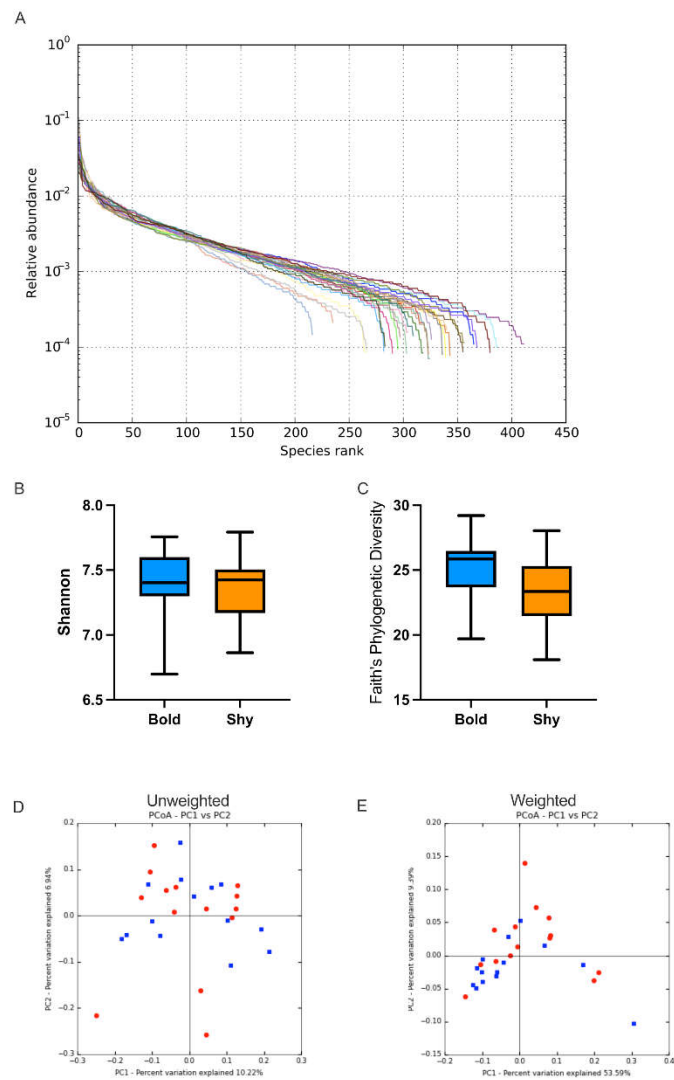

**Figure S1.** Alpha and beta diversity of gut microbiota in gerbils. **(A)** Rank Abundance of ASVs. **(B)** Alpha diversity: Shannon index. **(C)** Alpha diversity: Faith's phylogenetic diversity. **(D)** PCoA plot of unweighted UniFrac distance metrics. **(E)** PCoA plot of weighted UniFrac distance metrics.
